# Supplementary material
Source: PubMed Central journal article supplement (PMC5540778)
Supplement: NIHMS855057-supplement-supplement_1.pdf [file NIHMS855057-supplement-supplement_1.pdf]

456 Figure 3 Real-time PCR of cartilage expressed genes in WT and *Bgn<sup>-/-</sup>Fmod<sup>-/-</sup>*  
457 treated without or with BMP-2. A) Type II collagen (*Col2*), B) Type X collagen  
458 (*Col10*) C) *Sox9*, D) *ihh*. #*p*<0.01.

459

460 Figure 4. Immunohistochemistry (IHC) and real-time PCR of genes expressed in  
461 fibrocartilage and bone. A) IHC of type I collagen in WT (left panels) and *bgn<sup>-/-</sup>,*  
462 *fmod<sup>-/-</sup>* deficient condyles (right panels) treated without (top panel) or with (bottom  
463 panels) BMP-2. B) Real-time PCR of type I collagen (*Col1*), C) *Runx2* D) osterix  
464 (*Osx*) and E) *Wisp1* mRNA in WT and *Bgn<sup>-/-</sup>Fmod<sup>-/-</sup>* condyles treated with or  
465 without BMP-2. \**p*<0.05, #*p*<0.01

466

467 Figure 5. Assessment of bone resorption A) Tartrate Resistant Acid Phosphatase  
468 (TRAP) staining of osteoclasts in WT (left panels) and *Bgn<sup>-/-</sup>Fmod<sup>-/-</sup>* deficient  
469 condyles (right panels) treated without (top panel) or with (bottom panels) BMP-2.  
470 Real-time PCR to measure levels of B) TRAP (*Acp5*) C) *Rankl* D) and AdamTS4  
471 mRNA.

472

473 Supplementary:

474

475 Table S1. Primer sequences used for Real-Time PCR

476

477 S1. Diagram showing an outline of experimental approach used to treat and  
478 analyze the TMJ from WT *Bgn<sup>-/-</sup>Fmod<sup>-/-</sup>* mice.

479

480 S2. Low power view of condyle showing fibrocartilage, cartilage and subchondral  
481 bone layers. The Safranin O red stained area was used to quantify the relative  
482 area of cartilage present in treated and untreated WT and *Bgn*<sup>-/-</sup>*Fmod*<sup>-/-</sup> condyles.

483

484

Table 1 Primer sequences used for real-time PCR

|                    |                                                                                 |
|--------------------|---------------------------------------------------------------------------------|
| <i>Acan</i>        | forward 5' CCCGGTACCCTACAGAGACA3',<br>reverse 5' ACAGTGACCCTGGAAGTTGG3',        |
| <i>Col2A1</i>      | forward 5' CGAGGGCAACAGCAGGTTACATAC3'<br>reverse 5' GTCAATAATGGGAAGGCGGGAGGTC3' |
| <i>Col10A1</i>     | forward 5' GGGATGCCGCTTGTCAGTGCTAAC3'<br>reverse 5' TGGGTCGTAATGCTGCTGCCTATTG3' |
| <i>Sox9</i>        | forward 5' TCAGATGCAGTGAGGAGCAC3'<br>reverse 5' CCAGCCACAGCAGTGAGTAA3'          |
| <i>IHH</i>         | forward 5' ACGTGCATTGCTCTGTCAAG3'<br>reverse 3' CTCGATGACCTGGAAAGCTC3'          |
| <i>Col1A1</i>      | forward 5' CACCCTCAAGAGCCTGAGTC3'<br>reverse 5' GCTTCTTTTCCTTGGGGTTC3'          |
| <i>Runx2</i>       | forward 5' GCAGTTCCCAAGCATTTCAT3'<br>reverse 5' CACTCTGGCTTTGGGAAGAG3'          |
| <i>osx (SP7)</i>   | forward 5' AAGTGTGTGTGCCGTGGATA3'<br>reverse 5' GTCGAGAGGACTGGGGTACA3'          |
| <i>Wisp1</i>       | forward 5' ATCGCCCGAGGTACGCAATAGG3'<br>reverse 5' CAGCCCACCGTGCCATCAATG3'       |
| <i>Acp5 (Trap)</i> | forward 5' CAGCAGCCAAGGAGGACTAC3'<br>reverse 5' ACATAGCCCACACCGTTCTC3'          |
| <i>Rankl</i>       | forward 5' ATCGTGGTGTATGTCAGCCA3'<br>reverse 5' GTCATTCTGCACATTGTCCG3'          |
| <i>Adamts4</i>     | forward 5' CGCTGACCGCCAATGCCAACTG3'<br>reverse 5' CGCTGACCGCCAATGCCAACTG3'      |
| <i>S29</i>         | forward 5' GGAGTCACCCACGGAAGTTCCGG3'<br>reverse 5' GGAAGCACTGGCGGCACATG3'       |

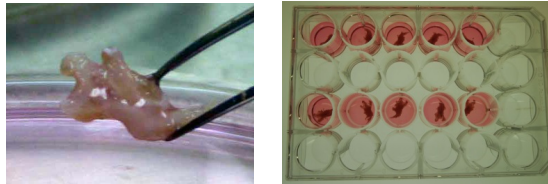

isolate whole mandible condyles from WT or *Bgn<sup>-/-</sup>Fmod<sup>-/-</sup>* mice

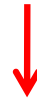

3 (histology) or 5 weeks (mRNA)

culture explants 24 -well plate for 24h

+/- BMP-2 48 hours

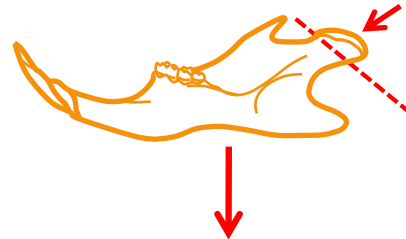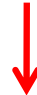

collect explants  
microCT, histology and mRNA analysis

S1 Experimental Design

**Fibrocartilage**  
**Cartilage**  
**Subchondral Bone**

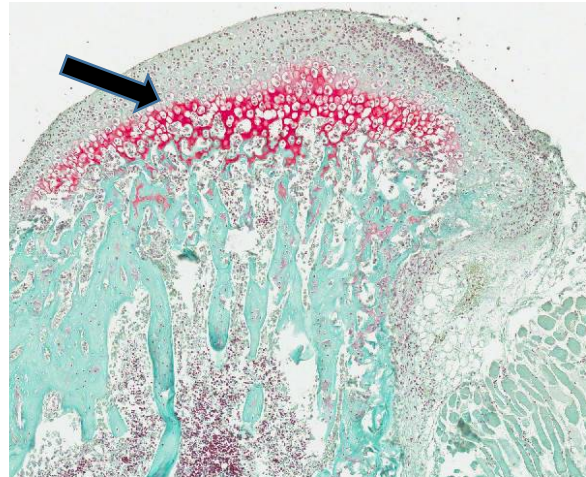

**S2. Safranin-O positive region (red stain) of the condyle under low power  
Showed the region of the condyle that was measured (arrow).**
